# Supplementary material
Source: Springer Nature journal article supplement (https://www.springermedizin.de/resource/supplementary/13012_2010_318_MOESM3_ESM.pdf/9629856)
Supplement: MOESM3 [file 9629856]

Identified FMG: n = 24

- Not meeting inclusion criteria: n = 3
  - In a teaching hospital (n = 2)
  - In a community health centre (n = 1)

Eligible FMG to be contacted by PI: n = 21

- Unable to reach Director: n = 1
- Declined on-site meeting: n = 12
  - Length of workshop (n = 5)
  - Lack of time for research (n = 3)
  - Not interested in clinical topic (n = 3)
  - Involved in other projects (n = 1)

On-site meeting: n = 8

- Declined the invitation: n = 3
  - Length of workshop (n = 2)
  - In a reorganisation process (n = 1)

Gave a late positive response<sup>a</sup>: n = 1

FMG RANDOMISED: n = 4

IMMEDIATE D+ Group (FMG): n = 2

Eligible FP: n = 20

Declined: n = 2

RECRUITED FP: n = 18

- Withdrawn: n = 2
  - Deceased (n = 1)
  - Too busy (n = 1)

DELAYED D+ Group (FMG): n = 2 (+1)

Eligible FP: n = 32

Declined: n = 11

RECRUITED FP: n = 21

- Withdrawn: n = 1
  - Promoted (n = 1)
